# Supplementary material for: Early Diagnosis of HIV among Infants Born to HIV-Positive Mothers on Option-B Plus in Kampala, Uganda
Source: Hindawi journal article supplement (doi:10.1155/2017/4654763), 2017-01-01
Supplement: f1 [file 4654763.f1.pdf]

748

**Supplementary material S1: Collinear variables in the model**

| <b>Unadjusted multinomial logistic regression analysis</b> |                                                                      |                |                                                                  |                |
|------------------------------------------------------------|----------------------------------------------------------------------|----------------|------------------------------------------------------------------|----------------|
| <b>Characteristics</b>                                     | <b>HEI tested by DNA-PCR outside EID guideline vs HEI not tested</b> |                | <b>HEI tested by DNA-PCR per EID guideline vs HEI not tested</b> |                |
|                                                            | <b>UOR (95% CI)</b>                                                  | <b>P-value</b> | <b>UOR (95% CI)</b>                                              | <b>P-value</b> |
| <b>Maternal education</b>                                  |                                                                      |                |                                                                  |                |
| None                                                       | 1                                                                    |                | 1                                                                |                |
| Primary                                                    | 0.49 (0.15-1.45)                                                     | 0.190          | 1.17 (0.26-5.28)                                                 | 0.834          |
| Secondary and over                                         | 2.72 (1.18 -6.29)                                                    | 0.019          | 8.34 (2.34-29.0)                                                 | 0.001          |
| <b>Health facility delivery</b>                            |                                                                      |                |                                                                  |                |
| No                                                         | 1                                                                    |                | 1                                                                |                |
| Yes                                                        | 2.82 (1.42-5.62)                                                     | 0.003          | 2.54 (1.22-4.93)                                                 | 0.012          |

749
